# Supplementary material for: The Relationship between Customers and Community Pharmacies during the COVID-19 (SARS-CoV-2) Pandemic: A Survey from Italy
Source: Int J Environ Res Public Health. 2021 Sep 11;18(18):9582. doi: 10.3390/ijerph18189582 (PMC8470071; doi:10.3390/ijerph18189582)
Supplement: Supplementary file 1 [file ijerph-18-09582-s001.zip › questionnaire data table_supplementary matherial.xlsx]

## Sheet: TABELLONE
										AGE						PERIOD						NOTE
		TOTAL	%	RURAL	%	URBAN	%	WEB	%	18 - 30	%	31 - 65	%	> 65	%	1	%	2	%	3	%	two users did not state their age
		502	1	44	0.0876494	370	0.737052	88	0.175299	117	0.234	306	0.612	77	0.154	120	0.239044	52	0.103586	330	0.657371
QUESTION	ANSWER	TOTAL	%	RURAL	%	URBAN	%	WEB	%	18 - 30	%	31 - 65	%	> 65	%	1	%	2	%	3	%
1. In this phase of the COVID-19 emer-gency, how useful do you rate the role of pharmacies overall?	1: not at all useful	5	0.00996016	1	0.0227273	4	0.0108108	0	0	1	0.00854701	4	0.0130719	0	0	0	0	0	0	5	0.0151515
	2	1	0.00199203	1	0.0227273	0	0	0	0	0	0	1	0.00326797	0	0	1	0.00833333	0	0	0	0
	3	29	0.0577689	6	0.136364	23	0.0621622	0	0	3	0.025641	21	0.0686275	5	0.0649351	9	0.075	7	0.134615	13	0.0393939
	4	111	0.221116	10	0.227273	65	0.175676	35	0.397727	41	0.350427	56	0.183007	14	0.181818	26	0.216667	9	0.173077	76	0.230303
	5: extremely useful	351	0.699203	25	0.568182	274	0.740541	53	0.602273	72	0.615385	219	0.715686	58	0.753247	84	0.7	36	0.692308	231	0.7
	No answer	5	0.00996016	1	0.0227273	4	0.0108108	0	0	0	0	5	0.0163399	0	0	0	0	0	0	5	0.0151515
		502	1	44	1	370	1	88	1	117	1	306	1	77	1	120	1	52	1	330	1
2. In this phase of the COVID-19 emergency, have you used a pharmacy to obtain information about COVID-19? (Symptoms, safety precautions, use of PPE etc.)	Yes	289	0.575697	18	0.409091	226	0.610811	45	0.511364	59	0.504274	186	0.607843	43	0.558442	77	0.641667	33	0.634615	179	0.542424
	No	210	0.418327	26	0.590909	141	0.381081	43	0.488636	58	0.495726	117	0.382353	34	0.441558	42	0.35	18	0.346154	150	0.454545
	No answer	3	0.0059761	0	0	3	0.00810811	0	0	0	0	3	0.00980392	0	0	1	0.00833333	1	0.0192308	1	0.0030303
		502	1	44	1	370	1	88	1	117	1	306	1	77	1	120	1	52	1	330	1
If so, did you receive the information re-quested?	Yes	282	0.975779	18	1	221	0.977876	44	0.977778	58	0.983051	184	0.989247	40	0.930233	77	1	32	0.969697	176	0.98324
	No	3	0.0103806	0	0	3	0.0132743	0	0	1	0.0169492	2	0.0107527	1	0.0232558	0	0	1	0.030303	3	0.0167598
	No answer	4	0.0138408	0	0	2	0.00884956	1	0.0222222	0	0	0	0	2	0.0465116	0	0	0	0	0	0
		289	1	18	1	226	1	45	1	59	1	186	1	43	1	77	1	33	1	179	1
3. Do you feel that the pharmacy was useful in supplying the public with essential PPE such as masks, gloves etc.?	Yes	423	0.842629	32	0.727273	316	0.854054	75	0.852273	99	0.846154	260	0.849673	63	0.818182	88	0.733333	44	0.846154	291	0.881818
	No	76	0.151394	11	0.25	52	0.140541	13	0.147727	18	0.153846	43	0.140523	14	0.181818	29	0.241667	8	0.153846	39	0.118182
	No answer	3	0.0059761	1	0.0227273	2	0.00540541	0	0	0	0	3	0.00980392	0	0	3	0.025	0	0	0	0
		502	1	44	1	370	1	88	1	117	1	306	1	77	1	120	1	52	1	330	1
4. Given the safety measures in place, what did you find to be the biggest disruption of service in the pharmacy?	Loss of face-to-face contact with the pharmacist	141	0.280876	10	0.227273	98	0.264865	33	0.375	41	0.350427	81	0.264706	19	0.246753	32	0.266667	14	0.269231	95	0.287879
	Restricted access to services (blood pressure, Holter, POCT etc.)	130	0.258964	12	0.272727	79	0.213514	39	0.443182	51	0.435897	67	0.218954	11	0.142857	40	0.333333	17	0.326923	73	0.221212
	Restricted freedom of movement in the pharmacy	150	0.298805	9	0.204545	109	0.294595	32	0.363636	38	0.324786	84	0.27451	28	0.363636	41	0.341667	16	0.307692	93	0.281818
	Loss of access to special health days	63	0.125498	3	0.0681818	41	0.110811	19	0.215909	24	0.205128	34	0.111111	5	0.0649351	15	0.125	4	0.0769231	44	0.133333
	Other	80	0.159363	12	0.272727	65	0.175676	3	0.0340909	5	0.042735	55	0.179739	19	0.246753	15	0.125	8	0.153846	57	0.172727
	No answer	50	0.0996016	5	0.113636	45	0.121622	0	0	3	0.025641	39	0.127451	8	0.103896	6	0.05	4	0.0769231	40	0.121212
		614	1.2231	51	1.1591	437	1.1811	126	1.4318	162	1.3846	360	1.1732	90	1.1558	149	1.2417	63	1.2115	402	1.2182
5. How useful do you rate the new ser-vices provided by the pharmacy in this emergency phase (home delivery, possibility to not go to the family doctor to collect the prescription, phone consultation)?	1: not at all useful	4	0.00796813	0	0	4	0.0108108	0	0	1	0.00854701	3	0.00980392	0	0	0	0	0	0	4	0.0121212
	2	8	0.0159363	2	0.0454545	6	0.0162162	0	0	1	0.00854701	3	0.00980392	4	0.0519481	3	0.025	4	0.0769231	1	0.0030303
	3	30	0.059761	5	0.113636	25	0.0675676	0	0	5	0.042735	18	0.0588235	7	0.0909091	8	0.0666667	7	0.134615	15	0.0454545
	4	114	0.227092	6	0.136364	73	0.197297	35	0.397727	38	0.324786	60	0.196078	16	0.207792	34	0.283333	8	0.153846	72	0.218182
	5: extremely useful	336	0.669323	30	0.681818	253	0.683784	53	0.602273	72	0.615385	217	0.70915	45	0.584416	73	0.608333	32	0.615385	231	0.7
	No answer	10	0.0199203	1	0.0227273	9	0.0243243	0	0	0	0	5	0.0163399	5	0.0649351	2	0.0166667	1	0.0192308	7	0.0212121
		502	1	44	1	370	1	88	1	117	1	306	1	77	1	120	1	52	1	330	1
6. Do you feel that the pharmacy is a safe place or that it may be a site of infection like the emergency depart-ment of a hospital?	Yes	439	0.874502	40	0.909091	329	0.889189	70	0.795455	98	0.837607	278	0.908497	62	0.805195	110	0.916667	39	0.75	290	0.878788
	No	54	0.10757	3	0.0681818	33	0.0891892	18	0.204545	19	0.162393	20	0.0653595	14	0.181818	9	0.075	11	0.211538	34	0.10303
	No answer	9	0.0179283	1	0.0227273	8	0.0216216	0	0	0	0	8	0.0261438	1	0.012987	1	0.00833333	2	0.0384615	6	0.0181818
		502	1	44	1	370	1	88	1	117	1	306	1	77	1	120	1	52	1	330	1
7. What was the most negative experi-ence you have had in the pharmacy in this emergency phase?	Unfriendly or distracted Staff	10	0.0199203	0	0	2	0.00540541	8	0.0909091	8	0.0683761	2	0.00653595	0	0	1	0.00833333	0	0	9	0.0272727
	Poor co-ordination between my family doctor and the pharmacist	89	0.177291	5	0.113636	60	0.162162	24	0.272727	33	0.282051	46	0.150327	10	0.12987	25	0.208333	6	0.115385	58	0.175758
	Delays in supplying products	97	0.193227	5	0.113636	61	0.164865	31	0.352273	38	0.324786	48	0.156863	11	0.142857	31	0.258333	11	0.211538	55	0.166667
	Products are too expensive	85	0.169323	12	0.272727	56	0.151351	17	0.193182	21	0.179487	50	0.163399	13	0.168831	28	0.233333	9	0.173077	48	0.145455
	Other	133	0.26494	14	0.318182	111	0.3	8	0.0909091	13	0.111111	92	0.300654	27	0.350649	22	0.183333	14	0.269231	97	0.293939
	No answer	88	0.175299	8	0.181818	80	0.216216	0	0	4	0.034188	68	0.222222	16	0.207792	13	0.108333	12	0.230769	63	0.190909
		502	1	44	1	370	1	88	1	117	1	306	1	77	1	120	1	52	1	330	1
8. In your opinion, how can the phar-macy improve its service(s) in the fu-ture given your experiences during this emergency?	Develop online consultancy	61	0.121514	1	0.0227273	52	0.140541	8	0.0909091	13	0.111111	42	0.137255	5	0.0649351	14	0.116667	12	0.230769	35	0.106061
	Develop home delivery service	60	0.119522	4	0.0909091	36	0.0972973	20	0.227273	25	0.213675	29	0.0947712	6	0.0779221	2	0.0166667	0	0	58	0.175758
	Improve co-operation with the family doctor	116	0.231076	11	0.25	78	0.210811	27	0.306818	30	0.25641	68	0.222222	17	0.220779	30	0.25	15	0.288462	71	0.215152
	Improve customer-care skills among pharmacists	37	0.0737052	5	0.113636	27	0.072973	5	0.0568182	6	0.0512821	25	0.0816993	6	0.0779221	21	0.175	5	0.0961538	11	0.0333333
	Increase number of services available in the pharmacy	124	0.247012	10	0.227273	89	0.240541	25	0.284091	34	0.290598	74	0.24183	16	0.207792	45	0.375	15	0.288462	64	0.193939
	Other	37	0.0737052	7	0.159091	30	0.0810811	0	0	4	0.034188	22	0.0718954	11	0.142857	3	0.025	1	0.0192308	33	0.1
	No answer	67	0.133466	6	0.136364	58	0.156757	3	0.0340909	5	0.042735	46	0.150327	16	0.207792	5	0.0416667	4	0.0769231	58	0.175758
		502	1	44	1	370	1	88	1	117	1	306	1	77	1	120	1	52	1	330	1
9. What do you think of the idea of a completely online pharmacy in the future?	1: strongly disagree	258	0.513944	23	0.522727	191	0.516216	44	0.5	59	0.504274	146	0.477124	53	0.688312	14	0.116667	25	0.480769	184	0.557576
	2	80	0.159363	8	0.181818	44	0.118919	28	0.318182	30	0.25641	45	0.147059	5	0.0649351	2	0.0166667	9	0.173077	46	0.139394
	3	60	0.119522	3	0.0681818	45	0.121622	12	0.136364	20	0.17094	36	0.117647	4	0.0519481	30	0.25	8	0.153846	31	0.0939394
	4	25	0.0498008	2	0.0454545	20	0.0540541	3	0.0340909	3	0.025641	17	0.0555556	5	0.0649351	21	0.175	1	0.0192308	11	0.0333333
	5: strongly agree	55	0.109562	7	0.159091	47	0.127027	1	0.0113636	4	0.034188	43	0.140523	6	0.0779221	45	0.375	7	0.134615	36	0.109091
	No answer	24	0.0478088	1	0.0227273	23	0.0621622	0	0	1	0.00854701	19	0.0620915	4	0.0519481	8	0.0666667	2	0.0384615	22	0.0666667
		502	1	44	1	370	1	88	1	117	1	306	1	77	1	120	1	52	1	330	1
